# Supplementary material for: Enhanced moisture delivery into Victoria Land, East Antarctica, during the early Last Interglacial: implications for West Antarctic Ice Sheet stability
Source: Copernicus journal article supplement (doi:10.5194/cp-17-1841-2021), 2021-09-17
Supplement: Supplementary file 1 [file cp-17-1841-2021-supplement.zip]

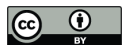

## *Supplement of*

# **Enhanced moisture delivery into Victoria Land, East Antarctica, during the early Last Interglacial: implications for West Antarctic Ice Sheet stability**

**Yuzhen Yan et al.**

*Correspondence to:* Yuzhen Yan (yuzhen.yan@rice.edu)

- cp-17-1841-2021-supplement-title-page.pdf
- Yan et al 2021 Clim Past\_Supplement for Production
  - .DS\_Store
  - Table S1.xlsx
  - Table S2.xlsx
  - Table S3.xlsx
  - Table S4.xlsx
  - Yan et al 2021 Clim Past Supplementary.pdf
- \_\_MACOSX
  - .\_Yan et al 2021 Clim Past\_Supplement for Production
  - Yan et al 2021 Clim Past\_Supplement for Production
    - \* .\_DS\_Store
    - \* .\_Table S1.xlsx
    - \* .\_Table S2.xlsx
    - \* .\_Table S3.xlsx
    - \* .\_Table S4.xlsx
    - \* .\_Yan et al 2021 Clim Past Supplementary.pdf

The copyright of individual parts of the supplement might differ from the article licence.
