# Supplementary material for: Enhanced moisture delivery into Victoria Land, East Antarctica, during the early Last Interglacial: implications for West Antarctic Ice Sheet stability
Source: Copernicus journal article supplement (doi:10.5194/cp-17-1841-2021), 2021-09-17
Supplement: Supplementary file 1 [file Table S1.xlsx]

## Sheet: New measurements
Depth (m)	δ15N (‰)	δ18Ograv (‰)	δO2/N2 (‰)	δ18Oatm (‰)	Note
15	0.091619	0.671359	-16.0292	0.655828
20.19	0.0932731	0.566584	-6.88686	0.550903
30.12	0.131582	0.42496	-16.0925	0.408994
35.62	0.104732	0.18568	-16.3314	0.169556
39.95	0.0936392	0.0248199	-11.317	0.00857121	Also measured in Spaulding et al (2013)
44	0.095261	-0.174712	-16.6701	-0.191077
50.05	0.108208	-0.295897	-9.55901	-0.312436
55.29	0.102925	-0.370222	-11.4627	-0.386912
60.47	0.0917006	-0.309736	-10.2632	-0.326574
68.09	0.124511	-0.14011	-14.7014	-0.157167
72.93	0.110593	0.036314	-9.04739	0.0191178
80.81	0.124471	0.590019	-14.852	0.572597
83.6	0.138478	0.724159	-13.2539	0.706656
92.11	0.153354	1.0001	-12.6767	0.98235
96.42	0.174429	1.03154	-8.3029	1.01367
99.86	0.164408	1.0608	-10.1822	1.04283
106.73	0.132807	1.12005	-19.3954	1.10188
112.21	0.148598	1.14327	-14.3807	1.12495
115.84	0.155703	1.13619	-13.4963	1.11776
120.16	0.137901	1.17091	-14.4416	1.15236
124.41	0.121532	1.11523	-16.9018	1.09655
126.73	0.0908538	1.11857	-19.9141	1.09983
129.06	0.0964235	1.08716	-18.1894	1.06835
134.55	0.0986868	0.991947	-15.34	0.97298
137.97	0.0950596	0.834117	-18.7096	0.815052
139.66	0.0874744	0.653655	-16.1774	0.634542
145.5	0.0970363	0.637685	-15.3314	0.618403
180.57	0.102605	0.127953	-23.9075	0.107664
182.51	0.110623	0.279725	-15.536	0.25938
183.96	0.110338	0.677008	-18.7536	0.656622
184.5	0.11079	0.767549	-16.2686	0.747147
184.97	0.081961	0.732129	-13.773	0.711714
185.69	0.0646301	0.550302	-15.312	0.529866
190.7	0.0854155	0.00345399	-20.0782	-0.017126
191.3	0.122302	-0.0745738	-13.6503	-0.095171
192.1	0.0992214	0.369793	-41.3232	0.349172
193.56	0.106871	0.643719	-42.3344	0.623056
194.19	0.108422	0.589608	-21.4343	0.568927
196.12	0.0984421	0.693929	-25.721	0.673193
199.95	0.114307	0.239458	-18.2108	0.218612
203.66	0.117528	0.0519637	2.23931	0.0310114
206.59	0.108153	0.201608	-12.8402	0.180571
207.38	0.103354	0.293066	-11.5125	0.272007
210.3	0.0560032	0.876903	-27.189	0.85576
211.46	0.0938154	0.580135	-41.7608	0.558959

## Sheet: Earlier measurements
Data source:
Spaulding, N.E., Higgins, J.A., Kurbatov, A.V., Bender, M.L., Arcone, S.A., Campbell, S., Dunbar, N.W., Chimiak, L.M., Introne, D.S. and Mayewski, P.A., 2013.
Climate archives from 90 to 250 ka in horizontal and vertical ice cores from the Allan Hills Blue Ice Area, Antarctica. Quaternary Research, 80(3), pp.562-574.
Depth (m)	δ15N (‰)	δO2/N2 (‰)	δ18Oatm (‰)
7.06	0.1282	-5.34826	0.503993
13.89	0.104698	-11.6352	0.674113
18.37	0.124449	-6.68358	0.571978
31.79	0.117019	-10.0738	0.349938
37.17	0.114844	-15.1363	0.202585
39.95	0.125692	-12.6158	-0.0123648
41.96	0.176051	-4.84771	-0.18546
46.94	0.125493	-12.4753	-0.231289
63.93	0.154279	-7.37203	-0.281927
74.08	0.0949802	-9.18379	0.180248
78.98	0.20493	-9.98733	0.393265
98.01	0.169709	-8.91698	1.0493
115.64	0.157593	-10.7221	1.09853
126.04	0.145053	-11.5514	1.08494
128.4	0.119219	-16.7431	1.14347
136.2	0.100638	-17.3797	0.853929
141.4	0.117843	-13.4355	0.649479
150.89	0.0696748	-3.09911	0.482896
161.95	0.137803	-13.1438	0.745806
166.9	0.163357	-19.188	0.719812
171.11	0.129366	-14.1911	0.238117
172.09	0.106246	-10.3472	0.0475234
176.97	0.124686	-14.7682	-0.126805
178.76	-0.110781	-15.7759	0.0655675
181.47	0.112659	-8.38615	-0.0162094
187.58	0.110475	-7.13934	0.195288
189.45	0.113882	-14.742	-0.0155712
194.15	0.106918	-12.4955	0.414616
198.18	0.136853	-17.6139	0.505858
199.05	0.17593	-5.24968	0.205336
201.39	0.154747	-16.9256	0.0438942
206.15	0.1286	-11.254	0.139502
206.57	0.229037	-18.841	0.233639
209.46	0.0999628	-18.5711	0.840084
212.08	-0.0298343	-6.3979	-0.0824036
219.79	0.0891415	-21.0692	0.681885
220.85	0.141116	-22.6878	0.789842
221.44	0.112829	-36.5167	0.93014
222.11	0.112418	-27.4481	0.752151
