# Supplementary material for: Enhanced moisture delivery into Victoria Land, East Antarctica, during the early Last Interglacial: implications for West Antarctic Ice Sheet stability
Source: Copernicus journal article supplement (doi:10.5194/cp-17-1841-2021), 2021-09-17
Supplement: Supplementary file 2 [file cp-17-1841-2021-supplement.zip]

Archive with 17 entries (14 files):
- cp-17-1841-2021-supplement-title-page.pdf
- __MACOSX/
- __MACOSX/._Yan et al 2021 Clim Past_Supplement for Production
- __MACOSX/Yan et al 2021 Clim Past_Supplement for Production/
- __MACOSX/Yan et al 2021 Clim Past_Supplement for Production/._Table S4.xlsx
- __MACOSX/Yan et al 2021 Clim Past_Supplement for Production/._.DS_Store
- __MACOSX/Yan et al 2021 Clim Past_Supplement for Production/._Table S1.xlsx
- __MACOSX/Yan et al 2021 Clim Past_Supplement for Production/._Table S2.xlsx
- __MACOSX/Yan et al 2021 Clim Past_Supplement for Production/._Table S3.xlsx
- __MACOSX/Yan et al 2021 Clim Past_Supplement for Production/._Yan et al 2021 Clim Past Supplementary.pdf
- Yan et al 2021 Clim Past_Supplement for Production/
- Yan et al 2021 Clim Past_Supplement for Production/.DS_Store
- Yan et al 2021 Clim Past_Supplement for Production/Table S1.xlsx
- Yan et al 2021 Clim Past_Supplement for Production/Table S4.xlsx
- Yan et al 2021 Clim Past_Supplement for Production/Yan et al 2021 Clim Past Supplementary.pdf
- Yan et al 2021 Clim Past_Supplement for Production/Table S2.xlsx
- Yan et al 2021 Clim Past_Supplement for Production/Table S3.xlsx
