# Supplementary material for: Enhanced moisture delivery into Victoria Land, East Antarctica, during the early Last Interglacial: implications for West Antarctic Ice Sheet stability
Source: Copernicus journal article supplement (doi:10.5194/cp-17-1841-2021), 2021-09-17
Supplement: Supplementary file 2 [file cp-17-1841-2021-supplement.zip › Yan et al 2021 Clim Past_Supplement for Production/Table S3.xlsx]

## Sheet: Sheet1
Depth (m)	Ice Age (a)	Ice Age uncertainty (1σ)	Gas age (a)-δ18Oatm only	Gas age (a)-GHG corrected	Gas age 95% CI-upper, absolute (a)	Gas age 95% CI-lower, absolute (a)	Match method	Note
7.06	114488	1684.48	105845	105845	109313	102391	Direct	95% CI directly matched
13.89	115683	1669.86	111195	111195	114813	107419	Peak
15	115941	1669.98	111491	111491	115104	107702	Direct
18.37	116715	1670.33	113972	113972	117594	109990	Direct	95% CI directly matched
20.19	117128	1670.52	114113	114113	117705	110159	Direct	95% CI directly matched
30.12	119264	1671.51	115945	115942	119346	112594	Direct	95% CI directly matched
31.79	119630	1671.67	116474	116465	119871	113110	Direct	95% CI directly matched
35.62	120478	1672.05	117625	117601	120953	114273	Peak
37.17	120853	1672.22	117878	117851	121205	114516	Peak
39.95	121550	1672.84	118789	118750	122072	115436	Direct	95% CI directly matched
41.96	122123	1673.97	120011	119957	123456	116613	Direct
44	122756	1675.18	120026	119972	123474	116628	Direct	95% CI directly matched
46.94	123654	1676.91	121016	120949	124399	117592	Peak
50.05	124313	1706.41	121676	121601	125045	118207	Peak
55.29	125399	1757.53	123478	123380	126783	119916	Peak
60.47	126251	1783.51	124155	124048	127466	120531	Direct
63.93	126623	1773.74	125084	124966	128395	121387	Direct	95% CI directly matched
68.09	127082	1761.85	125639	125514	129018	121999	Direct	95% CI directly matched
72.93	127613	1748.34	126296	126162	129754	122574	Direct	95% CI directly matched
74.08	127743	1745.14	126935	126793	130363	123220	Direct	95% CI directly matched
78.98	128027	1735.61	127502	127353	130864	123840	Direct	95% CI directly matched
80.81	128114	1732.41	127992	127837	131327	124345	Direct	95% CI directly matched
83.6	128247	1727.43	128261	128102	131560	124643	Direct	95% CI directly matched
92.11	129535	1808.11	129156	129017	132498	125533	Direct
96.42	130366	1891.8	129583	129464	132979	125945	Direct
98.01	130688	1924.97	129661	129546	133061	126025	Peak
99.86	131014	1959.01	130152	130060	133624	126488	Direct
106.73	132247	2091.78	130268	130181	133770	126585	Direct
112.21	133200	2199.18	130415	130335	133946	126716	Peak
115.64	133778	2267.46	130860	130801	134476	127115	Peak
115.84	133805	2270.68	131009	130957	134656	127247	Direct
120.16	134502	2355.25	131107	131059	134781	127326	Peak
124.41	135189	2439.24	131495	131465	135293	127624	Direct
126.04	135432	2468.89	132041	132037	135997	128060	Peak
126.73	135571	2485.87	132260	132266	136313	128201	Direct
128.4	136209	2539.15	132367	132378	136487	128251	Peak
129.06	136303	2545.17	132635	132659	136854	128443	Direct
134.55	140087	2766.1	136108	136294	141415	131130	Direct
136.2	141347	2834.27	140524	140916	146650	135099	Direct	95% CI directly matched
137.97	142642	2903.04	140970	141382	147131	135646	Direct	95% CI directly matched
139.66	143904	2970.6	142971	143477	149318	137847	Peak
141.4	145149	3039.17	143856	144403	150709	138421	Direct	95% CI directly matched
145.5	148038	3204.77	145782	146046	152626	139735	Direct
150.89	151732	3419.69	147184	147184	153821	140785	Peak	Anchor point
161.95	159763	3544.03	154860	154860	162789	147010	Direct
166.9	164027	3237.48	160613	160613	167570	153685	Direct
171.11	168427	2991.96	166582	166582	172510	160655	Direct	95% CI directly matched
172.09	170843	2916.3	168097	168097	174142	162042	Direct	95% CI directly matched
176.97	182096	2676.82	173793	173793	179542	168042	Peak
178.76	184401	2635.33	174850	174850	180507	169191	No match; interpolated
180.57	186929	2589.25	175918	175918	181684	170153	Peak
181.47	188138	2567.3	177222	177222	182403	172043	Peak
182.51	189548	2541.97	179628	179628	184850	174412	Direct	95% CI directly matched
183.96	192003	2464.15	181591	181591	186906	176285	Direct
184.5	192468	2447.79	184484	184484	189844	179136	Peak
184.97	193221	2306.76	186261	186261	191370	181169	Direct
185.69	194153	2157.83	187862	187862	192935	182807	Direct	95% CI directly matched
187.58	195606	2114.5	191259	191259	196097	186422	Direct	95% CI directly matched
189.45	197146	2101.45	193356	193356	197952	188759	Peak
190.7	197767	2096.24	194772	194772	199009	190533	Peak
191.3	198489	2090.33	197301	197301	201251	193348	Peak
192.1	198794	2087.77	202005	202005	206026	197979	Direct	95% CI directly matched
193.56	199791	2079.58	203289	203289	207423	199149	Peak
194.15	200271	2075.65	204819	204819	209052	200579	Peak
194.19	200271	2075.65	204831	204831	209065	200591	No match; interpolated
196.12	201695	2063.88	205424	205424	209678	201164	Peak
198.18	203067	2052.64	206915	206915	211281	202544	No match; interpolated
199.05	204319	2072.07	207545	207545	211975	203110	Peak
199.95	205876	2115.13	209848	209848	214410	205282	Peak
201.39	208879	2199.01	214201	214201	218960	209442	Direct	95% CI directly matched
203.66	213692	2335.17	216205	216205	220932	211478	Direct
206.15	218938	2485.59	217027	217027	221769	212284	Direct
206.57	218938	2485.59	217423	217423	222203	212643	Peak
206.59	218938	2485.59	218980	218980	224014	213946	Peak
207.38	222149	2798.46	221585	221585	227375	215795	Direct	95% CI directly matched
209.46	228997	3030.61	227694	227694	233884	221363	Direct
210.3	230982	2937.9	228586	228586	234897	222106	Direct
211.46	233900	2803.37	234489	234489	239354	229088	Direct	95% CI directly matched
212.08	235394	2735.54	239912	239912	244288	235439	Peak
219.79	248474	2575.55	243105	243105	247305	238904	Direct	95% CI directly matched
220.85	249552	2696.81	243365	243365	247556	239166	Direct
221.44	251003	2799.47	243416	243416	247607	239215	Peak
222.11	252693	2854.13	244283	244283	248502	239982	Direct	95% CI directly matched
