# Supplementary material for: Enhanced moisture delivery into Victoria Land, East Antarctica, during the early Last Interglacial: implications for West Antarctic Ice Sheet stability
Source: Copernicus journal article supplement (doi:10.5194/cp-17-1841-2021), 2021-09-17
Supplement: Supplementary file 2 [file cp-17-1841-2021-supplement.zip › Yan et al 2021 Clim Past_Supplement for Production/Table S4.xlsx]

## Sheet: Sheet1
Depth (m)	δDice (‰)	Ice age (a)	Gas age (a)	Δage (a)	Δage 95% CI-upper	Δage 95% CI-lower	Accumulation rate (m/yr)	95% CI upper (m/yr)	95% CI lower (m/yr)	Predicted δ15N (‰)
13.89	-306.6	115683	111195	4488	2662.71	6608.93	0.0023	0.0035	0.0014	0.0638046
15	-318.2	115941	111491	4449.82	2629.57	6598.75	0.0026	0.0041	0.0015	0.0814139
18.37	-302.9	116715	113972	2742.57	1140.07	5046.5	0.0025	0.0066	0.0016	0.0618811
20.19	-290.3	117128	114113	3014.91	1432.34	5303.42	0.0023	0.0049	0.0014	0.0474934
30.12	-289.8	119264	115942	3321.75	1999.89	4494.19	0.0032	0.0044	0.002	0.0544747
31.79	-292.7	119630	116465	3165.32	1815.63	4378.78	0.0034	0.0048	0.0021	0.0589538
35.62	-308.4	120478	117601	2876.42	1712.71	3968.53	0.005	0.0068	0.0029	0.0906632
37.17	-307.5	120853	117851	3001.91	1805.13	4143.17	0.0046	0.0063	0.0027	0.086247
39.95	-294.1	121550	118750	2799.54	1697.97	3879.58	0.0041	0.0058	0.0025	0.0656401
41.96	-306.3	122123	119957	2165.94	775.032	3097.99	0.0067	0.0101	0.0039	0.0994971
44	-304.6	122756	119972	2784.33	1192.38	3987.79	0.0046	0.0068	0.0027	0.0822763
46.94	-314.2	123654	120949	2704.45	1182.09	4002.4	0.0054	0.0081	0.0029	0.102689
50.05	-310.3	124313	121601	2711.93	1199.11	4107.81	0.0047	0.0076	0.0026	0.0910483
55.29	-318.8	125399	123380	2019.08	857.345	3349.01	0.0067	0.0135	0.0036	0.120806
60.47	-304.4	126251	124048	2202.66	932.787	3719.86	0.0045	0.0094	0.0026	0.0812391
63.93	-314.8	126623	124966	1657.03	686.383	3067.54	0.0062	0.0172	0.0036	0.109896
68.09	-296.3	127082	125514	1568.47	612.276	2563.28	0.0069	0.0141	0.004	0.0859773
72.93	-301.5	127613	126162	1450.5	509.116	2378	0.0089	0.0172	0.0047	0.104702
74.08	-310	127743	126793	949.418	314.349	1602.23	0.0179	0.0397	0.0092	0.163329
78.98	-294.9	128027	127353	674.262	175.345	1185.33	0.0213	0.0538	0.0113	0.141891
80.81	-299	128114	127837	276.864	-0.214641	568.177	0.0655	0.2787	0.035	0.257213
83.6	-299	128247	128102	145.112	-79.1262	385.753	0.0864	0.9044	0.0589	0.29403
92.11	-295.1	129535	129017	517.997	80.7631	980.668	0.0254	0.0845	0.0145	0.154691
96.42	-310.8	130366	129464	901.93	192.305	1634.62	0.0165	0.0436	0.0087	0.159242
98.01	-299.6	130688	129546	1142.17	257.24	2046.87	0.0082	0.0243	0.0053	0.0979561
99.86	-313.8	131014	130060	954.03	167.959	1771.35	0.0128	0.0418	0.0079	0.148482
106.73	-296.3	132247	130181	2065.56	377.385	3769.64	0.0038	0.0092	0.0022	0.0659249
112.21	-310.9	133200	130335	2865.04	415.036	5327.06	0.0029	0.007	0.0016	0.075344
115.64	-305.6	133778	130801	2976.98	345.27	5623.05	0.0024	0.0061	0.0014	0.0637911
115.84	-298.6	133805	130957	2848.04	326.04	5386.21	0.0024	0.0059	0.0014	0.0563767
120.16	-314.1	134502	131059	3442.82	304.277	6595.02	0.0021	0.0055	0.0013	0.0700124
124.41	-331.9	135189	131465	3723.79	217.807	7244.48	0.0022	0.0064	0.0013	0.0953958
126.04	-332.6	135432	132037	3395.3	136.298	6674.24	0.0027	0.0074	0.0015	0.104069
126.73	-320.1	135571	132266	3304.82	142.808	6489.21	0.0025	0.0064	0.0014	0.0827236
128.4	-351.2	136209	132378	3830.85	300.129	7382.46	0.003	0.0084	0.0017	0.144294
129.06	-347.2	136303	132659	3644.49	278.602	7034.57	0.0028	0.0085	0.0017	0.132325
134.55	-336.4	140087	136294	3793.33	804.284	6853.56	0.0028	0.0067	0.0016	0.11197
