# Supplementary material for: Enhanced moisture delivery into Victoria Land, East Antarctica, during the early Last Interglacial: implications for West Antarctic Ice Sheet stability
Source: Copernicus journal article supplement (doi:10.5194/cp-17-1841-2021), 2021-09-17
Supplement: Supplementary file 2 [file Table S2.xlsx]

## Sheet: CO2
Depth (m)	CO2 (ppm)	Note
5.44	238.99
29.0025	275.29	Anchor point
37.26	279.67
46.97	272.68
53.42	276.12
57.31	274.8
63.95	276.02
71.095	273.94
76.3825	273.95
79	278.91
87.105	287.46	Tie point; tied to 128.5 ka
93.83	270.04
108.32	269.58
112.04	266.69
115.74	239.66
142.25	194.35
151	200.92

## Sheet: CH4
Depth (m)	CH4 (ppb)	Note
5.85	507.56
18.41	472.11
29.0315	516.09
37.2	577.668
83.7	737.86
87.0675	755.29
99.905	523.97
115.69	476.96
120.891	473.81
134.615	371.71
139.72	376.84
142.125	416.05	Tie point; tied to 144.8 ka
